# Supplementary material for: Discovery of Sustainable Drugs for Neglected Tropical Diseases: Cashew Nut Shell Liquid (CNSL)‐Based Hybrids Target Mitochondrial Function and ATP Production in Trypanosoma brucei
Source: PubMed Central journal article supplement (PMC6686156; doi:10.1002/cmdc.201800790), 2019-02-05
Supplement: CMDC-14-621-s001.pdf [file CMDC-14-621-s001.pdf]

## Supporting Information

### **Discovery of Sustainable Drugs for Neglected Tropical Diseases: Cashew Nut Shell Liquid (CNSL)-Based Hybrids Target Mitochondrial Function and ATP Production in *Trypanosoma brucei***

Michela Cerone,<sup>[a, b]</sup> Elisa Uliassi,<sup>[a]</sup> Federica Prati,<sup>[a]</sup> Godwin U. Ebiloma,<sup>[b, c]</sup>  
Leandro Lemgruber,<sup>[b, d]</sup> Christian Bergamini,<sup>[a]</sup> David G. Watson,<sup>[e]</sup> Thais de A. M. Ferreira,<sup>[f]</sup>  
Gabriella Simões Heyn Roth Cardoso,<sup>[f]</sup> Luiz A. Soares Romeiro,<sup>[f]</sup> Harry P. de Koning,<sup>[b]</sup> and  
Maria Laura Bolognesi\*<sup>[a]</sup>

cmdc\_201800790\_sm\_miscellaneous\_information.pdf

**Table of contents**

|                                     |    |
|-------------------------------------|----|
| <b>Fig. S1</b>                      | S2 |
| <b>Fig. S2</b>                      | S3 |
| <b>Fig. S3</b>                      | S4 |
| <b>Table S1</b>                     | S5 |
| <b>Compound purity and Table S2</b> | S6 |

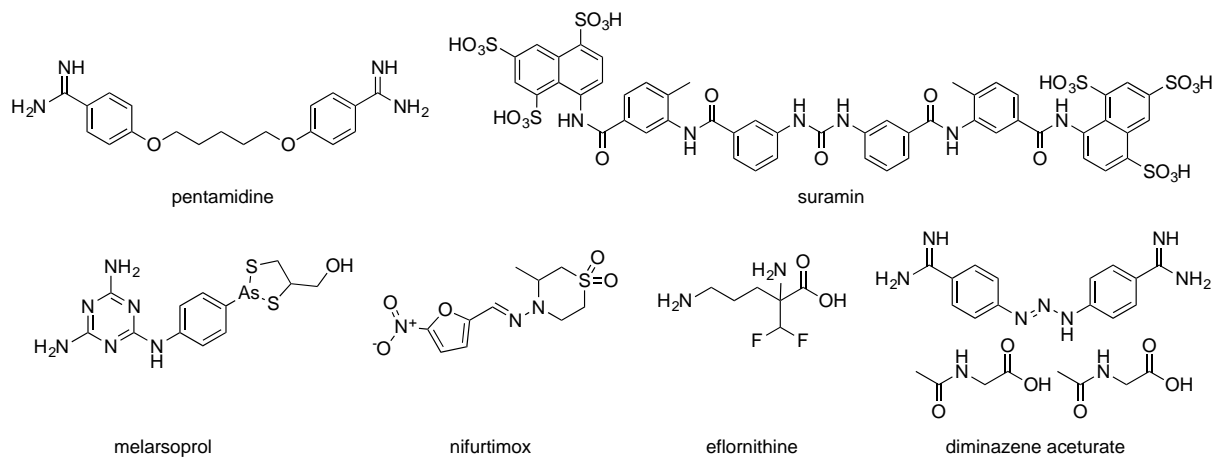

**Fig. S1.** Available drugs for the treatment of human African trypanosomiasis (HAT) and animal African trypanosomiasis (AAT).

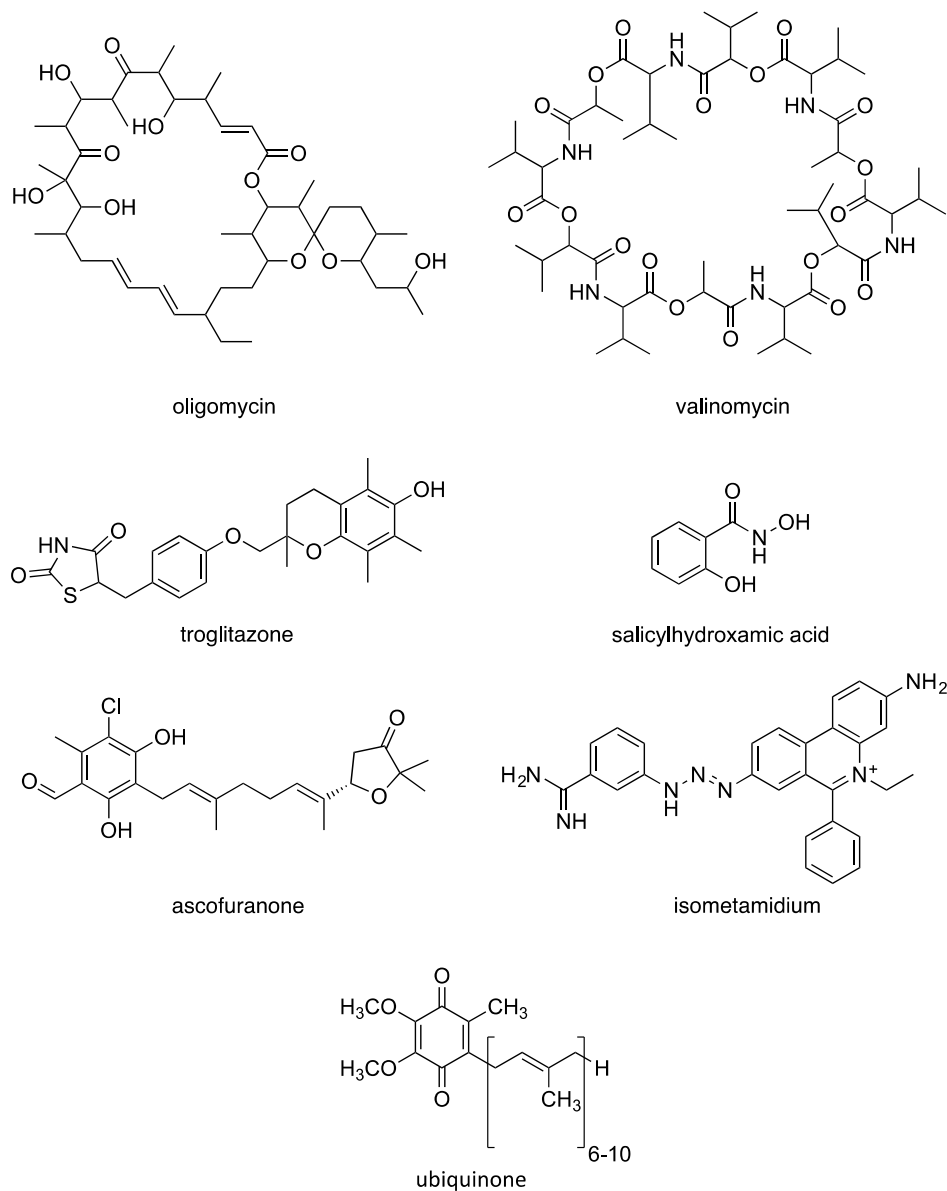

**Fig. S2.** Positive and negative controls used in the experiments aimed at determining the mitochondrial effects of the hybrids.

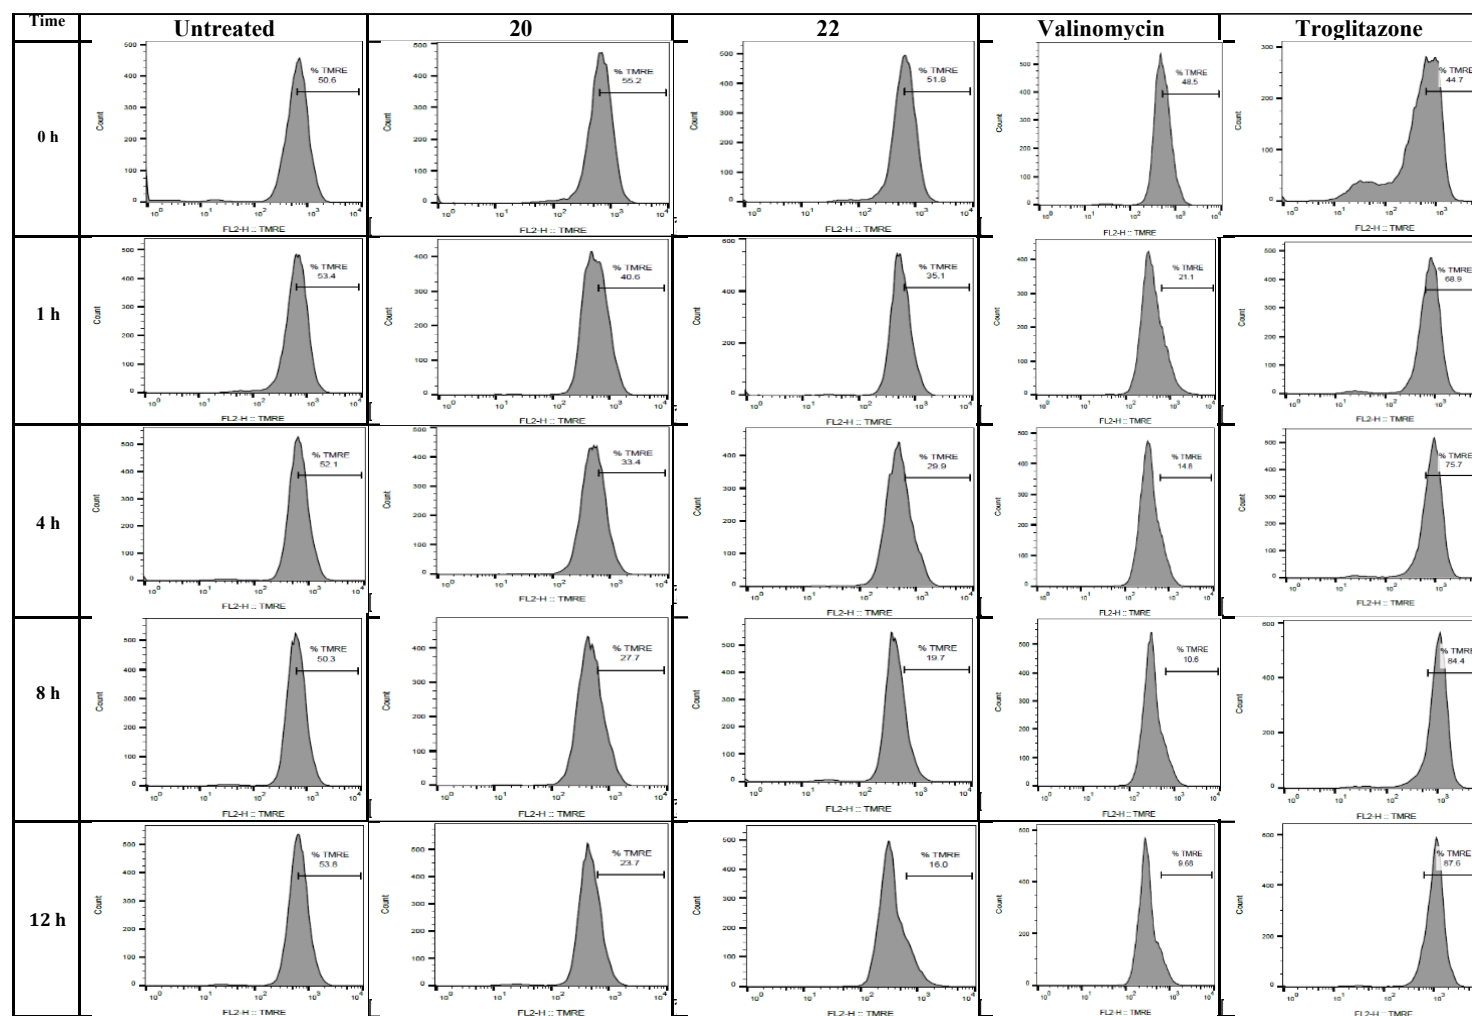

2

**Fig. S3.** Histograms of one sample determination of TMRE (200 nM) fluorescence in *T. b. brucei* s427WT BSF treated with **20** and **22** ( $\frac{1}{2}$  EC<sub>50</sub>). Values are given as the percentage of cells with fluorescence above 500 arbitrary units (A. U.), which was set at approximately 50% for the untreated control at t = 0 h. A shift to higher fluorescence represents an increasing of MMP because of a stronger accumulation of TMRE in the mitochondrion; lower values represent a decreasing of MMP.

**Table S1.** Physico-chemical properties of **8-22** predicted with FAF-Drugs4 software (<http://fafdrugs3.mti.univ-paris-diderot.fr>).

|           | <b>MW</b> | <b>logP</b> | <b>logD</b> | <b>logSw</b> | <b>tPSA</b> | <b>RotatableB</b> | <b>Flexibility</b> | <b>HBD</b> | <b>HBA</b> |
|-----------|-----------|-------------|-------------|--------------|-------------|-------------------|--------------------|------------|------------|
| <b>8</b>  | 518.68    | 10.88       | 9.52        | -8.83        | 69.67       | 18                | 0.47               | 0          | 5          |
| <b>9</b>  | 548.71    | 10.85       | 9.36        | -8.93        | 78.90       | 19                | 0.49               | 0          | 6          |
| <b>10</b> | 548.71    | 10.85       | 9.36        | -8.93        | 78.90       | 19                | 0.49               | 0          | 6          |
| <b>11</b> | 534.68    | 11.07       | 9.86        | -9.05        | 89.90       | 18                | 0.47               | 1          | 6          |
| <b>12</b> | 534.68    | 11.07       | 9.86        | -9.05        | 89.90       | 18                | 0.47               | 1          | 6          |
| <b>13</b> | 460.65    | 10.75       | 9.52        | -8.53        | 43.37       | 16                | 0.46               | 0          | 3          |
| <b>14</b> | 490.67    | 11.0        | 9.36        | -8.8         | 52.60       | 17                | 0.47               | 0          | 4          |
| <b>15</b> | 490.67    | 11.0        | 9.36        | -8.8         | 52.60       | 17                | 0.47               | 0          | 4          |
| <b>16</b> | 476.65    | 11.22       | 9.86        | -8.93        | 52.60       | 16                | 0.46               | 1          | 4          |
| <b>17</b> | 476.65    | 11.22       | 9.86        | -8.93        | 63.60       | 16                | 0.46               | 1          | 4          |
| <b>18</b> | 378.46    | 5.64        | 4.97        | -5.24        | 63.60       | 10                | 0.34               | 1          | 4          |
| <b>19</b> | 408.49    | 5.62        | 4.81        | -5.34        | 72.83       | 11                | 0.37               | 1          | 5          |
| <b>20</b> | 408.49    | 5.62        | 4.81        | -5.34        | 72.83       | 11                | 0.37               | 1          | 5          |
| <b>21</b> | 394.46    | 5.84        | 5.31        | -5.47        | 83.83       | 10                | 0.34               | 2          | 5          |
| <b>22</b> | 394.46    | 5.84        | 5.31        | -5.47        | 83.83       | 10                | 0.34               | 2          | 5          |

### Compound purity

The purity of **8-22** was determined using Kinetex® 5µm EVO C18 100 Å, LC Column 150 x 4.6 mm and HPLC Jasco Corporation (Tokyo, Japan) instrument, model PU-1585 UV equipped with a 20 µL loop valve. HPLC parameters were the following: MeOH (eluent A) and H<sub>2</sub>O with 0.05% trifluoroacetic acid (eluent B); flow rate 1.0 mL/min; elution type isocratic with 50% of eluent A and 50% of eluent B; detection UV-Vis Abs at 254 nm.

The samples were dissolved in MeOH (10 µg/mL).

**Table S2.** Compound purity by HPLC.

| Entries   | Purity (%) | t <sub>R</sub> | Entries   | Purity (%) | t <sub>R</sub> | Entries   | Purity (%) | t <sub>R</sub> |
|-----------|------------|----------------|-----------|------------|----------------|-----------|------------|----------------|
| <b>8</b>  | 97         | 3.0            | <b>13</b> | 95         | 3.0            | <b>18</b> | 100        | 2.9            |
| <b>9</b>  | 96         | 3.3            | <b>14</b> | 99         | 3.5            | <b>19</b> | 100        | 3.1            |
| <b>10</b> | 95         | 3.5            | <b>15</b> | 95         | 3.3            | <b>20</b> | 97         | 3.0            |
| <b>11</b> | 100        | 4.2            | <b>16</b> | 96         | 4.1            | <b>21</b> | 100        | 3.9            |
| <b>12</b> | 95         | 4.2            | <b>17</b> | 95         | 4.2            | <b>22</b> | 100        | 4.1            |
